# Supplementary material for: Dopamine signaling impairs ROS modulation by mitochondrial hexokinase in human neural progenitor cells
Source: Oxford University Press journal article supplement (doi:10.1042/bsr20211191), 2021-11-25
Supplement: bsr-2021-1191_supp.pdf [file bsr-2021-1191_supp.pdf]

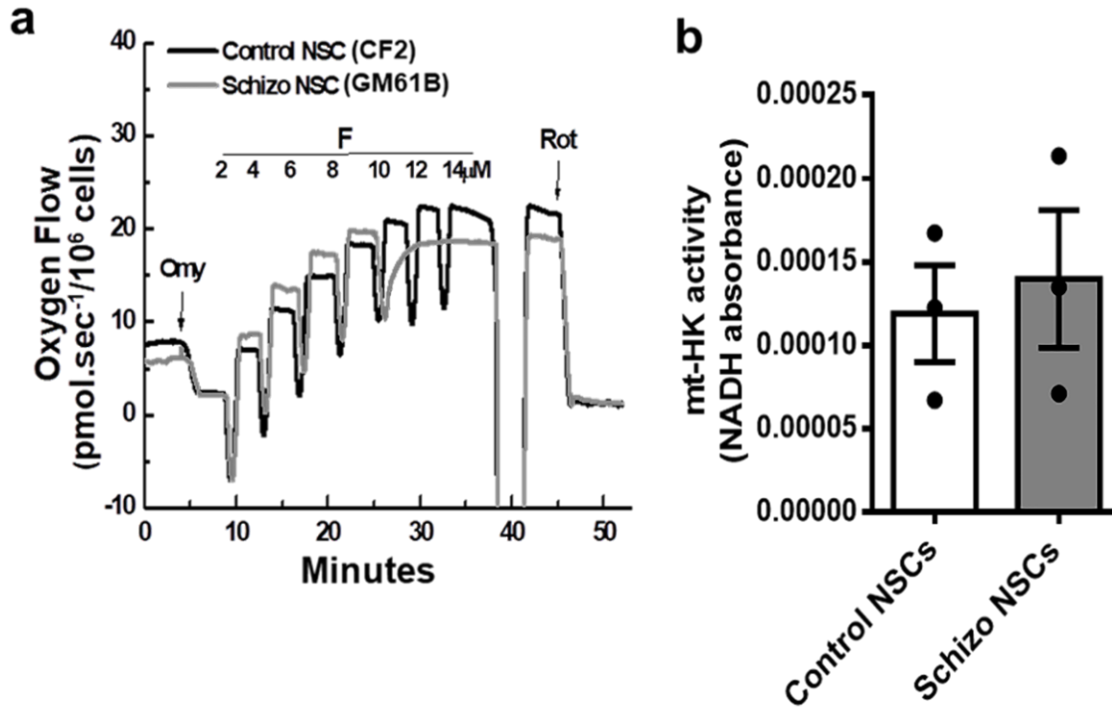

**Supplementary Figure 1: NSCs derived from schizophrenic and control individuals present similar mitochondrial function and mt-HK coupled-activity.** (a) Representative data of mitochondrial function of control and schizophrenia patients-derived NSCs in response to sequential additions of 1 μg/mL Oligomycin (Omy), 1 μM pulses of FCCP and 2,5 μM Antimycin A (Ama). (b) Quantification of mt-HK activity measurement from control and schizophrenic-derived NSCs. The difference between groups was analyzed by unpaired t-test (n=3 per group).
